1 **Feeding practices and cost of diet of six-month-old HIV exposed uninfected**  
2 **compared to HIV unexposed uninfected infants in a peri-urban community**  
3 **in South Africa**

4

5 Mothusi Nyofane<sup>1, 2, 3</sup>, Marinel Hoffman<sup>1,2, 3</sup>, Tanita Botha<sup>2, 3, 4</sup>, Ute Feucht<sup>2, 3, 5</sup>

6 <sup>1</sup> Department of Consumer and Food Sciences, University of Pretoria, Pretoria, South Africa

7 <sup>2</sup>Centre for Maternal, Fetal, Newborn and Child Health Care Strategies, University of Pretoria,  
8 Pretoria, South Africa

9

10 <sup>3</sup>Research Unit for Maternal and Infant Health Care Strategies, South African Medical  
11 Research Council, Pretoria, South Africa

12

13 <sup>4</sup>Department of Statistics, University of Pretoria, Pretoria, South Africa

14 <sup>5</sup>Department of Paediatrics, University of Pretoria, Pretoria, South Africa

15

16

17

18 \*Corresponding author:

19 Email: [mothusinyofane@gmail.com](mailto:mothusinyofane@gmail.com) (MN)

20 Author contributions:

21 MN performed the research. MH, UF and MN designed the research study. MH and UF  
22 contributed essential tools. TC and MN analysed the data. MN wrote the paper, with assistance  
23 from the co-authors. MN, UF, MH and TC approved the final version of the manuscript.

24

25

## 26 Abstract

27 **Background:** The increasing population of HIV-exposed-uninfected (HEU) infants are known  
28 to be at risk of poor nutritional status and suboptimal growth, with biological risk factors  
29 implicated, yet the cost to families of feeding infants is often overlooked.

30 **Objective:** The study compared the infant feeding practices and costs and macronutrient intake  
31 of HEU vs HIV-unexposed-uninfected (HUU) six-month-old infants in the Gauteng Province  
32 of South Africa.

33 **Methods:** A cross-sectional study investigated 46 HEU and 55 HUU infants aged six months  
34 and utilised a single quantified 24-hr recall and the FoodFinder™ program for meal analysis.  
35 The estimation of diet cost utilised supermarket food prices based on the 24-hr recall method.

36 **Results:** Mothers of HEU infants had significantly lower income ( $p<0.01$ ) and educational  
37 attainment ( $p=0.03$ ). The infant feeding practices differed between HEU vs HUU infants  
38 ( $p=0.05$ ): exclusive breastfeeding (50.0% vs 34.0%) and mixed breastfeeding (38.1% vs  
39 64.2%). Common complementary foods for HEU versus HUU infants included commercial  
40 infant cereals (CIC) (48.7% vs 70.9%;  $p=0.04$ ); fruits and vegetables (33.3% vs 15.7%;  $p=0.05$ )  
41 and maize meal porridge (25.6% vs 15.7%;  $p=0.24$ ), respectively. The mean daily cost of diet  
42 of HEU vs HUU infants was  $8.55\pm 7.35$ ZAR ( $\$0.68\pm 0.59$ USD) vs  $10.97\pm 7.92$ ZAR  
43 ( $\$0.88\pm 0.63$  USD); ( $p=0.10$ ). Regarding the complementary feeding, there were non-  
44 significant differences in protein, fat, and carbohydrate intakes ( $p>0.05$ ) and their costs per  
45 daily intake ( $p>0.05$ ) between the groups.

46 **Conclusion:** There are no significant differences in cost, feeding and macronutrient intakes  
47 between HEU and HUU. Suboptimal breastfeeding practices remains an issue within the first  
48 six months. More sustained effort is required to support and promote exclusive breastfeeding.

49 **Keywords:** Cost of diet, nutrient intakes, breastfeeding, HIV-exposed-uninfected infants,  
50 HIV-unexposed-uninfected infants, South Africa

## 51 **Introduction**

52 Globally, the human immunodeficiency virus (HIV) continues to adversely affect women, in  
53 particular, women of reproductive age [1]. Approximately 1.4 million women living with HIV  
54 infection (WLHIV) become pregnant every year [2]. South Africa is greatly affected, with 8.2  
55 million people living with HIV in 2021 [3], with a high HIV prevalence (26.3%) among women  
56 of reproductive age [4]. In the absence of antiretroviral therapy (ART), there is a 25% to 30%  
57 risk of mother to child transmission of HIV during pregnancy, delivery and breastfeeding [1].  
58 The World Health Organization (WHO) prevention of mother-to-child transmission (PMTCT)  
59 guideline recommends that all pregnant WLHIV should be on ART during pregnancy as part  
60 of PMTCT interventions [1,5]. In South Africa, access to ART has increased over the years,  
61 with an estimated >95% ART coverage during pregnancy and delivery [6], and this has ensured  
62 sharp declines in new vertical HIV transmissions in infants born to WLHIV [2,6,7,8]. This has  
63 resulted in an expanding population of HIV-exposed-uninfected (HEU) infants, estimated  
64 globally at 14.8 million in 2018, with South Africa having a high HEU population of 3.5 million  
65 (23.8%) [2,9]. Compared to their HIV-unexposed-uninfected (HUU) counterparts, the HEU  
66 children's early and later growth has been reported to be suboptimal [10], with the risk of  
67 malnutrition [11].

68 The 2016 WHO guideline update on HIV and infant feeding advised alignment of infant  
69 feeding guidelines for WLHIV and HIV-negative women within the context of ART provision  
70 for WLHIV [12]. These include exclusive breastfeeding (EBF) for the first six months, with  
71 subsequent introduction of high-quality complementary feeds together with continued  
72 breastfeeding [12]. Nonetheless, the percentage of EBF is still suboptimal in South Africa. The  
73 South African Demographic and Health Survey of 2016 reported EBF of 32% among children  
74 under age six months [13], and Remmert et al. reported 30% EBF among WLHIV in KwaZulu-  
75 Natal, South Africa [14]. The maternal HIV status has an influence on breastfeeding practices,

76 including breastfeeding cessation due to fear of HIV vertical transmission [14,15]. The  
77 suboptimal breastfeeding practices, coupled with early and/or inadequate introduction of  
78 complementary feeding, is associated with a high risk of infant infections and malnutrition  
79 [16,17].

80 Infants require a healthy diet at the proper time to grow and develop to their full potential.  
81 There is a strong reported relationship between HIV infection, poverty, food insecurity, and  
82 malnutrition, with suboptimal maternal health resulting in reduced ability to perform daily  
83 activities, including income generation, adequate infant care, and feeding practices [18]. South  
84 African complementary foods mostly comprise of maize meal porridge and commercial infant  
85 cereals (CIC) [19,20,21]. Food prices strongly influence the selection of food and dietary  
86 quality and ultimately affect infant nutritional status [22,23]. The CIC have a high nutrient  
87 density but are more costly than low nutrient density staple foods used as complementary feeds  
88 [19,24]. Macronutrient intake plays a central role during infant growth and development and  
89 throughout life. Fatty acids support growth and development through their roles in membrane  
90 lipids and supporting brain and retinal development; thus, insufficient intake limits  
91 neurodevelopment [25]. Protein intake is vital for health, physical growth and development,  
92 with dietary protein deficiency causing different forms of undernutrition, such as stunting and  
93 severe acute malnutrition [26]. These macronutrients, together with carbohydrates, provide  
94 energy and building blocks essential for growth.

95 The WHO recommends the introduction of age-appropriate complementary feeds at the age of  
96 six months after initial EBF [27], but little is documented about the cost of diet to the families  
97 and the comparison in infant feeding practices between HEU and HUU infants. Better  
98 knowledge on real-life infant feeding practices can enhance guidance given to mothers on  
99 infant feeding practices, food choices and complementary diet planning. Cost of diet analysis  
100 allows identification of food items contributing to nutrient-dense diet and their cost, including

101 food items that contribute to high cost but with low nutrients. We therefore determined and  
102 compared the cost of diet in relation to nutrient intake and feeding practices of HEU versus  
103 HUU infants aged six months.

## 104 **Materials and Methods**

### 105 **Study design**

106 This cross-sectional and comparative study was part of a larger study (Siyakhula study) on  
107 evaluating factors affecting foetal and infant immunity, growth, and neurodevelopment in HEU  
108 children. Low-risk (as per South African antenatal care guidelines) pregnant WLHIV and HIV-  
109 negative women were identified from 2017 and continually recruited at 28 weeks of pregnancy  
110 at the University of Pretoria/South African Medical Research Council (SAMRC) Research  
111 Centre for Maternal, Fetal, Newborn and Child Health Care Strategies in Kalafong Provincial  
112 Tertiary Hospital in Gauteng Province, South Africa, with their HEU or HUU infants being  
113 longitudinally followed up for two years. The infants started turning six months from October  
114 2018 and data collection for this study was completed in May 2020.

### 115 **Study population**

116 Participants were screened for eligibility by research assistants in local languages and English.  
117 Exclusion criteria included mothers who were minors (<18 years), had multiple pregnancies,  
118 maternal chronic medical conditions including diabetes and hypertension, HIV-infected  
119 infants, and lack of informed consent. The anticipated sample size was 100 mother-infant dyads  
120 (HEU n=50; HUU n=50). In May 2020, 113 participants had six-month-old infants; of these,  
121 12 mother-infant dyads had either lost to follow-up to the study or relocated (n=11), or infants  
122 had been diagnosed with HIV infection (n=1). Therefore, 101 mother-infant dyads (HEU n=46;  
123 HUU n=55) were investigated. All WLHIV self-reported taking ART during pregnancy and  
124 postpartum. Infants (HEU n=7; HUU n=4) who were exclusively breastfed at the time of study

125 visit were excluded in the cost of diet analysis. Therefore, cost of diet was calculated for 39  
126 HEU and 51 HUU infants.

### 127 **Data collection**

128 Written informed consent was obtained from eligible mothers for themselves and their infants  
129 to participate in the study. The researcher and trained research assistants administered the  
130 questionnaires in a private room in local languages and English, and mothers were  
131 compensated with 100 ZAR (roughly 7 USD) for transport. Interviews lasted for 30–40  
132 minutes. The quantified single 24-hr recall was used to collect infant dietary intake and  
133 included intake on Sundays, Tuesdays, and Wednesdays. The research assistants were trained  
134 on the procedures for administering a 24-hr recall. For estimating and recording the reported  
135 amount of consumed food, a standardized dietary kit containing samples of food and food  
136 containers, household utensils, and photographs was utilized. Dry oats were used in dish-up  
137 and measure for estimating and recording the consumed quantity, mostly for prepared food.  
138 Breast milk substitutes (BMS) and CIC were noted per dry quantity and liquid. The 24-hr recall  
139 has been validated for accurate intake measurement in children, in which the mother is  
140 interviewed to report a child's dietary intake [28].

141 The estimation of diet cost utilised supermarket food prices and the diet diaries method [29],  
142 however, a single 24-hr recall was used as an alternative to diet diaries. The supermarket food  
143 prices were collected in February 2019 from three local supermarkets and the list comprised  
144 food items that were not on special offer and were of the lowest prices [29]. The previously  
145 used maternal and infant postpartum questionnaire was used to collect data on breastfeeding  
146 practices, the introduction of complementary foods and socio-demographic variables. The food  
147 purchasing practices were self-reported using a structured and pretested self-designed food cost  
148 questionnaire; however, this questionnaire was administered to a portion of participants (HEU  
149 n=23; HUU n=27).

## 150 **Data processing and statistical analysis**

151 The collected data were managed using the Research Electronic Data Capture (REDCap)  
152 system. All household food intake measurements coded on the 24-hr recall were converted to  
153 weight using the SAMRC Food Quantities Manual prior to meal analysis and the SAMRC  
154 FoodFinder™ 3.0 program was used to quantify macronutrients intake [30]. The dietary intake  
155 included food, beverages and BMS consumed by infants. Where the flavour of food, fruit eaten  
156 or type of soft porridge drank were not specified, the commonly reported consumed food  
157 flavour (banana flavour), fruit (banana) or soft porridge (maize meal porridge) were used.  
158 Three food prices per food item were manually converted to a price per 100g of consumed food  
159 items, and the average price was calculated. The costs of diet and nutrient intake were  
160 calculated using the amount of food items eaten and macronutrients to food prices per 100g.  
161 Any intake of breastmilk was excluded, as this research aimed to describe the nutrient intake  
162 from purchased food items and BMS. The study used IBM SPSS Statistics (version 25)  
163 software for descriptive statistics. Nutrient intakes and their costs were tested for normality  
164 using the Shapiro–Wilks test. These data were not normally distributed, hence reported by the  
165 median and interquartile range (IQR). To determine the significance of differences between the  
166 HEU and HUU infants, the Mann–Whitney U test was used. All significance tests were  
167 performed at a 5% level of significance. Cessation of breastfeeding is reported categorically  
168 within the six-month period, and the statistic test was done using Pearson’s Chi-squared test.

## 169 **Ethical consideration**

170 The study was approved by the University of Pretoria Faculty of Natural and Agricultural  
171 Sciences Research Ethics Committee and Faculty of Health Sciences Research Ethics  
172 Committee. Further permissions were obtained from Kalafong Provincial Tertiary Hospital and  
173 Tshwane District Health Department. The process of data collection was voluntary and

174 confidential. The study was conducted in accordance with ethical guidelines set in the 2013  
175 Declaration of Helsinki.

## 176 Results

### 177 Socio-demographic and food purchasing information

178 Significantly higher percentages of WLHIV had lower educational qualifications (52.2% vs  
179 29.1%;  $p=0.03$ ) and were in the lowest income category (<4000 ZAR/month; <\$320  
180 USD/month) (69.8% vs 36.4%;  $p=0.002$ ), whereas more of the HIV-negative mothers were in  
181 the highest monthly income category of >8000 ZAR/month (>\$640 USD/month) (26% vs 5%;  
182  $p=0.002$ ) (Table 1). We found no significant differences in food purchasing practices between  
183 the two groups.

184 **Table 1:** The socio-demographic characteristics and food purchasing practices of mothers,  
185 grouped by HIV infection status

|                                                            | HIV-infected<br>mothers (n=46)              | HIV-uninfected<br>mothers (n=55)              | P-value <sup>a</sup> |
|------------------------------------------------------------|---------------------------------------------|-----------------------------------------------|----------------------|
| <b>Age of infants (months; days) (median (IQR))</b>        | 6.3 (6.1;6.5)                               | 6.2 (6.1;6.4)                                 | 0.56                 |
| <b>Sex of infants (%)</b>                                  |                                             |                                               | 0.10                 |
| Male                                                       | 30 (65.2%)                                  | 27 (49.1%)                                    |                      |
| Female                                                     | 16 (34.8%)                                  | 28 (50.9%)                                    |                      |
| <b>The educational level of the mother (%)</b>             |                                             |                                               | <b>0.03</b>          |
| Any primary or secondary school                            | 24 (52.2%)                                  | 16 (29.1%)                                    |                      |
| Secondary school completed                                 | 13 (28.3%)                                  | 22 (40.0%)                                    |                      |
| Certificate/Diploma completed                              | 9 (19.6%)                                   | 12 (21.8%)                                    |                      |
| Undergraduate degree completed                             | 0 (0.0%)                                    | 5 (9.1%)                                      |                      |
| <b>Number of children in the household<sup>b</sup> (%)</b> |                                             |                                               | 0.80                 |
| One or two children                                        | 14 (66.7%)                                  | 17 (63.0%)                                    |                      |
| Three to five children                                     | 7 (33.3%)                                   | 10 (37.0%)                                    |                      |
| <b>Household income per month<sup>c</sup> (%)</b>          |                                             |                                               | <b>0.002</b>         |
| ZAR 0 – ZAR 4000 <sup>d</sup>                              | 30 (69.8%)                                  | 20 (36.4%)                                    |                      |
| ZAR 4000 – ZAR 8000                                        | 11 (25.6%)                                  | 21 (38.1%)                                    |                      |
| >ZAR 8000                                                  | 2 (4.6%)                                    | 14 (25.5%)                                    |                      |
|                                                            | HIV-infected<br>mothers (n=23) <sup>e</sup> | HIV-uninfected<br>mothers (n=27) <sup>e</sup> | P-value              |
| <b>Number of household members with income (%)</b>         |                                             |                                               | <b>0.05</b>          |
| One                                                        | 12 (52.2%)                                  | 15 (55.6%)                                    |                      |
| Two                                                        | 3 (13.0%)                                   | 8 (29.6%)                                     |                      |
| >Two                                                       | 1 (4.4%)                                    | 3 (11.1%)                                     |                      |
| None                                                       | 7 (30.4%)                                   | 1 (3.7%)                                      |                      |
| <b>Household receiving a social grant(s) (%)</b>           |                                             |                                               | 0.92                 |
| Yes, child support grant                                   | 19 (82.6%)                                  | 22 (81.5%)                                    |                      |
| No                                                         | 4 (17.4%)                                   | 5 (18.5%)                                     |                      |
| <b>Number of children receiving grants<sup>f</sup> (%)</b> |                                             |                                               | 0.92                 |
| One to two                                                 | 12 (66.7%)                                  | 15 (68.2%)                                    |                      |



|                                                             |            |            |      |
|-------------------------------------------------------------|------------|------------|------|
| ≥Three                                                      | 6 (33.3%)  | 7 (31.8%)  |      |
| <b>Food purchased in bulk or daily (%)</b>                  |            |            | 0.31 |
| Bulk                                                        | 18 (78.3%) | 24 (88.9%) |      |
| Daily                                                       | 5 (21.7%)  | 3 (11.1%)  |      |
| <b>Food purchased when on special offer (%)</b>             |            |            | 0.56 |
| Yes                                                         | 6 (26.1%)  | 5 (18.5%)  |      |
| No                                                          | 4 (17.4%)  | 8 (29.6%)  |      |
| Sometimes                                                   | 13 (56.5%) | 14 (51.9%) |      |
| <b>Food purchased from<sup>g</sup> (%)</b>                  |            |            | 0.64 |
| Street vendor                                               | 1 (4.3%)   | 2 (7.7%)   |      |
| Big supermarkets/supermarkets                               | 2 (8.7%)   | 4 (15.4%)  |      |
| Local shops                                                 | 20 (87.0%) | 20 (76.9%) |      |
| <b>Reason for shop preference (%)</b>                       |            |            | 0.12 |
| Proximity to home                                           | 11 (47.8%) | 6 (22.2%)  |      |
| Prices of foodstuff                                         | 7 (30.4%)  | 15 (55.6%) |      |
| Quality of foodstuff                                        | 5 (21.8%)  | 6 (22.2%)  |      |
| <b>Quality of fruits and vegetables sold on streets (%)</b> |            |            | 0.89 |
| Is fresh most of the times                                  | 8 (34.8%)  | 7 (25.9%)  |      |
| Is sometimes fresh                                          | 13 (56.6%) | 17 (63.0%) |      |
| Is never fresh                                              | 1 (4.3%)   | 2 (7.4%)   |      |
| Not sure                                                    | 1 (4.3%)   | 1 (3.7%)   |      |

186

187 Abbreviations: IQR: Interquartile range

188 <sup>a</sup>P-values <0.05 show significant differences and are bolded. Pearson's Chi-squared was used to compare HIV-  
189 infected and HIV-uninfected mothers.

190

191 <sup>b</sup>n= 21 (HIV-infected mothers) and n= 27 (HIV-uninfected mothers)

192 <sup>c</sup>n= 42 (HIV-infected mothers) and n= 55 (HIV-uninfected mothers)

193 <sup>d</sup>Conversion factor: 1 ZAR= 0,064176 USD (Available at <https://www.curvert.com/en/zar-usd/> (Cited:  
194 13/11/2020)

195

196 <sup>e</sup>The food cost questionnaire was utilized in a subgroup of participants, which included 23 HEU and 27 HUU  
197 mother-infant pairs.

198

199 <sup>f</sup>n= 18 (HIV-infected mothers) and n= 22 (HIV-uninfected mothers)

200 <sup>g</sup>n= 23 (HIV-infected mothers) and n= 26 (HIV-uninfected mothers)

## 201 **Infant feeding practices**

202 The feeding practices are presented in Table 2. The overall infant feeding practices within the  
203 first six months differed between WLHIV and their HIV-negative counterparts ( $p=0.05$ ); the  
204 question asked, “Thinking about the time between when your baby was born and now (this  
205 visit), how did you feed your baby from birth until now?”. Any current breastfeeding was  
206 documented in 61.5% of WLHIV and 67.9% of HIV-negative mothers ( $p=0.37$ ). In a sizable  
207 percentage, both WLHIV and HIV-negative women had stopped breastfeeding very early

208 (before four weeks) (26.7% vs 11.8%;  $p=0.39$ ). Many WLHIV started introducing BMS from  
 209 as early as 4 – 8 weeks (31.3%), while HIV-negative women started giving BMS from 8 – 12  
 210 weeks (35.3%);  $p=0.49$ . Reasons given for the early introduction of BMS in WLHIV and their  
 211 HIV-negative counterparts was because they wanted to return to work (25.0% vs 37.4%), job  
 212 searching and schooling (25.0% vs 27.3%) and perceived insufficient breastmilk (25.0% vs  
 213 18.2%) ( $p=0.38$ ). Further, the percentages of EBF during the first six months were 50.0%  
 214 among WLHIV and 34.0% among HIV-negative mothers ( $p=0.20$ ). The mixed breastfeeding  
 215 (MBF) practices were higher among HIV-negative mothers (64.2%) compared to WLHIV  
 216 (38.1%); ( $p=0.03$ ). The percentages of formula feeding (FF) as only milk feeds given within  
 217 the first six months were 11.9% in WLHIV and 1.8% among HIV-negative mothers.

218 **Table 2:** The infant feeding practices of HIV-infected and HIV-uninfected mothers during the  
 219 first six months of life

|                                                                     | HIV-infected<br>mothers (n=46) | HIV-uninfected<br>mothers (n=55) | <i>P</i> -value <sup>a</sup> |
|---------------------------------------------------------------------|--------------------------------|----------------------------------|------------------------------|
| <b>Infant feeding practices within first six months<sup>b</sup></b> |                                |                                  | <b>0.05</b>                  |
| Exclusive breastfeeding                                             | 21 (50.0%)                     | 18 (34.0%)                       | 0.20                         |
| Exclusive formula feeding                                           | 5 (11.9%)                      | 1 (1.8%)                         | -                            |
| Mixed breastfeeding                                                 | 16 (38.1%)                     | 34 (64.2%)                       | 0.03                         |
| <b>Ever attempted breastfeeding the baby<sup>c</sup></b>            |                                |                                  | 0.11                         |
| Yes                                                                 | 40 (88.9%)                     | 52 (98.1%)                       |                              |
| No                                                                  | 5 (11.1%)                      | 1 (1.9%)                         |                              |
| <b>Early initiation of breastfeeding after delivery<sup>d</sup></b> |                                |                                  | 0.96                         |
| Within one hour                                                     | 30 (75.0%)                     | 37 (75.5%)                       |                              |
| After one hour                                                      | 10 (25.0%)                     | 12 (24.5%)                       |                              |
| <b>Currently breastfeeding (at age of six months)<sup>e</sup></b>   |                                |                                  | 0.37                         |
| Yes                                                                 | 24 (61.5%)                     | 35 (67.3%)                       |                              |
| No                                                                  | 15 (38.5%)                     | 17 (32.7%)                       |                              |
| <b>Timing of breastfeeding cessation<sup>f</sup></b>                |                                |                                  | 0.39                         |
| 1 – 4 weeks                                                         | 4 (26.7%)                      | 2 (11.8%)                        |                              |
| 4 – 8 weeks                                                         | 5 (33.3%)                      | 4 (23.5%)                        |                              |
| 8 – 12 weeks                                                        | 3 (20.0%)                      | 8 (47.1%)                        |                              |
| 12 – 16 weeks                                                       | 2 (13.3%)                      | 3 (17.6%)                        |                              |
| 20 – 24 weeks                                                       | 1 (6.7%)                       | 0 (0%)                           |                              |
| <b>Timing of introduction of BMS<sup>g</sup></b>                    |                                |                                  | 0.49                         |
| 1 – 4 weeks                                                         | 4 (25.0%)                      | 3 (8.8%)                         |                              |
| 4 – 8 weeks                                                         | 5 (31.3%)                      | 8 (23.5%)                        |                              |
| 8 – 12 weeks                                                        | 4 (25.0%)                      | 12 (35.3%)                       |                              |
| 12 – 16 weeks                                                       | 2 (12.5%)                      | 8 (23.5%)                        |                              |
| 20 – 24 weeks                                                       | 1 (6.3%)                       | 3 (8.8%)                         |                              |
| <b>Reasons for introduction of BMS<sup>h</sup></b>                  |                                |                                  | 0.38                         |
| Job searching and schooling                                         | 4 (25.0%)                      | 9 (27.3%)                        |                              |
| Mother needed to return to work                                     | 4 (25.0%)                      | 12 (36.4%)                       |                              |
| Insufficient breastmilk to satisfy the baby's hunger                | 4 (25.0%)                      | 6 (18.2%)                        |                              |
| Painful breasts or painful nipples                                  | 3 (18.8%)                      | 2 (6.1%)                         |                              |

Breastfeeding took too long/was too tiring 1 (6.3%) 0 (0%)  
 Convenience/ to allow others to feed the baby 0 (0%) 2 (6.1%)

220

221 Abbreviations: HEU: HIV-exposed-uninfected; HUU: HIV-unexposed-uninfected; BMS: Breast milk substitutes

222 <sup>a</sup>*P*-values<0.05 shows significant differences and are bolded. Pearson's Chi-squared was used to compare the  
 223 mothers of HEU and HUU infants.

224

225 <sup>b</sup> n = 42 (HIV-infected mothers) and n = 53 (HIV-uninfected mothers)

226 <sup>c</sup> n = 45 (HIV-infected mothers) and n = 53 (HIV-uninfected mothers)

227 <sup>d</sup> n = 40 (HIV-infected mothers) and n = 49 (HIV-uninfected mothers)

228 <sup>e</sup> n = 39 (HIV-infected mothers) and n = 52 (HIV-uninfected mothers)

229 <sup>f</sup> For the timing of breastfeeding cessation, n = 15 for HEU infants and n = 17 for HUU infants (these were the  
 230 infants who were not currently breastfeeding).

231

232 <sup>g</sup> For those that had introduced breastmilk substitutes; n = 16 for HEU infants and n = 34 for HUU infants.

233 <sup>h</sup> n = 16 (HIV-infected mothers) and n = 31 (HIV-uninfected mothers)

### 234 **Common complementary foods introduced to infants**

235 Overall, by six months 89.1% of WLHIV and their HIV-negative counterparts self-reported  
 236 introducing their infants to BMS and/or complementary foods, with no significant difference  
 237 between the groups (92.7% of HUU; 84.8% of HEU; *p*=0.20). The most common food items  
 238 introduced to HEU and HUU infants, respectively, were CIC (48.7% vs 70.6%; *p*=0.03), fruits  
 239 and vegetables (33.3% vs 15.7%; *p*=0.05) and bottled baby foods (25.6% vs 41.2%; *p*=0.12)  
 240 (Table 3). The common fruit items were banana and orange, and vegetables included potatoes,  
 241 sweet potato, and butternut. Margarine, salt, cooking oil, BMS and peanut butter were  
 242 commonly used during infants' food preparation for both groups.

243 **Table 3:** The common complementary foods and breastmilk substitutes given to infants,  
 244 comparing HIV-exposed-uninfected to HIV-unexposed-uninfected infants

245

| Food items                | HEU (n = 39)    | HUU (n = 51)    | <i>P</i> -values <sup>a</sup> |
|---------------------------|-----------------|-----------------|-------------------------------|
|                           | Food items = 67 | Food items = 96 |                               |
| Commercial infant cereals | 19 (48.7%)      | 36 (70.6%)      | <b>0.03</b>                   |
| Maize meal porridge       | 10 (25.6%)      | 8 (15.7%)       | 0.24                          |
| Sorghum porridge          | 7 (17.9%)       | 7 (13.7%)       | 0.58                          |

|                                       |            |            |             |
|---------------------------------------|------------|------------|-------------|
| Bottled baby food                     | 10 (25.6%) | 21 (41.2%) | 0.12        |
| Fruits and vegetables                 | 13 (33.3%) | 8 (15.7%)  | <b>0.05</b> |
| Juices and tea                        | 3 (7.7%)   | 7 (13.7%)  | -           |
| Savoury snacks or biscuits            | 0 (0.0%)   | 4 (7.8%)   | -           |
| BMS only at age 6 months <sup>b</sup> | 5 (12.8%)  | 5 (9.8%)   | 0.65        |

246

247 Abbreviations: HEU: HIV-exposed-uninfected; HUU: HIV-unexposed-uninfected; BMS: Breastmilk Substitutes

248 <sup>a</sup>Pearson's Chi-squared was used.  $P < 0.05$  indicates significant differences and is formatted in bold type

249 <sup>b</sup>Consumption of BMS only, no complementary foods consumed.

### 250 **The daily cost of food per infant**

251 The calculations considered the total amount of food and BMS consumed as well as the price  
252 per 100g for each food item consumed. The total daily mean cost of diet of HEU infants was  
253  $8.55 \pm 7.35$  ZAR ( $\$0.68 \pm 0.59$  USD) while it was  $10.97 \pm 7.92$  ZAR ( $\$0.88 \pm 0.63$  USD) for HUU  
254 infants, with no significant difference between the groups ( $p = 0.10$ ).

### 255 **The daily macronutrient intake and their costs per infant**

256 The nutrient intake and cost thereof, as reported in Table 4, indicate no differences in median  
257 intakes of protein, fat, and carbohydrate between HEU and HUU infants ( $p$ -values  $> 0.05$ ), for  
258 all complementary foods and BMS consumed in addition to any breastmilk. No differences  
259 were found in the cost for these macronutrients between the HEU and HUU groups ( $p$ -  
260 values  $> 0.05$ ). The findings on adequacy of macronutrient intake of complementary diets  
261 showed similar low intakes of protein, fat and carbohydrates between HEU and HUU (Table  
262 5). These findings were based on the estimated average requirement (EAR) for protein  
263 (1g/kg/d) and adequate intake (AI) values for fat (30g) and carbohydrate (95g) established by  
264 the US Institute of Medicine [31].

265 **Table 4:** The infants' nutrient intake (excluding breastmilk intake) and their daily mean cost  
266 per day, comparing HIV-exposed-uninfected to HIV-unexposed-uninfected infants<sup>a</sup>

267

|  | HEU (n = 39) | HUU (n = 51) | $P$ -values <sup>b</sup> |
|--|--------------|--------------|--------------------------|
|--|--------------|--------------|--------------------------|

|                           | Median (IQR)      | Median (IQR)      |      |
|---------------------------|-------------------|-------------------|------|
| <b>Protein (g)</b>        | 9.5 (4.1;15.2)    | 10.8 (6.5;16.4)   | 0.34 |
| <b>Fat (g)</b>            | 9.3 (1.8;17.3)    | 10.6 (4.3;20.8)   | 0.36 |
| <b>Carbohydrate(g)</b>    | 63.3 (25.6;100.5) | 69.1 (40.1;107.8) | 0.26 |
|                           | Mean (SD) in ZAR  | Mean (SD) in ZAR  |      |
| <b>Protein (g)</b>        | 1.15 ± 1.12       | 1.38 ± 1.07       | 0.19 |
| <b>Fat (g)</b>            | 1.50 ± 1.70       | 1.91 ± 1.82       | 0.14 |
| <b>Carbohydrate(g)</b>    | 5.90 ± 4.78       | 7.67 ± 5.35       | 0.09 |
| <b>Total cost of diet</b> | 8.55±7.35         | 10.97±7.92        | 0.10 |

268

269 Abbreviations: HEU: HIV-exposed-uninfected; HUU: HIV-unexposed-uninfected; IQR: Interquartile Range; g:

270 gram; SD: Standard Deviations; ZAR: South African Rand

271

272 <sup>a</sup>The nutrient intake and cost includes complementary foods and breastmilk substitutes but excludes breastmilk

273 intake.

274

275 <sup>b</sup>P-values <0.05 show significant differences. Mann–Whitney U test was used to compare nutrient intakes between

276 HEU and HUU infants.

277

278 <sup>c</sup>Conversion factor: 1 ZAR = 0,064176 USD (Available at <https://www.curvert.com/en/zar-usd/> (Cited:

279 13/11/2020)

280

281 **Table 5:** The daily adequacy of macronutrient intake from complementary diets among HIV-

282 exposed-uninfected and HIV-unexposed-uninfected infants using the dietary reference intake

283 of the Institute of Medicine as comparisons<sup>a</sup>

284

| Macronutrients                  | DRI (6-months) | HEU (n = 34) | HUU (n = 46) | P-value <sup>b</sup> |
|---------------------------------|----------------|--------------|--------------|----------------------|
| <b>Protein<sup>c</sup></b>      | 1g/kg/day      |              |              | 0.89                 |
| Above                           |                | 21.2%        | 17.4%        |                      |
| Below                           |                | 78.8%        | 82.6%        |                      |
| <b>Fat<sup>d</sup></b>          | 30g            |              |              | -                    |
| Above                           |                | 0.0%         | 0.0%         |                      |
| Below                           |                | 100.0%       | 100.0%       |                      |
| <b>Carbohydrate<sup>d</sup></b> | 95g            |              |              | 0.24                 |
| Above                           |                | 36.4%        | 21.7%        |                      |
| Below                           |                | 63.6%        | 78.3%        |                      |

285

286 Abbreviations: BMS: Breastmilk substitute; HEU: HIV-exposed-uninfected; HUU: HIV-unexposed-uninfected;

287 DRI: Dietary Reference Intake; EAR: Estimated Average Requirement; AI: Adequate Intake; g: gram; kg:

288 kilogram

289

290 <sup>a</sup>The macronutrient adequate analysis involved only complementary diets consumed by HEU (N=34) and HUU

291 (n=46) infants.

292

293 <sup>b</sup>P-values <0.05 shows significant differences. Pearson's Chi-squared was used to compare nutrient intakes

294 between HEU and HUU infants.

295

296 <sup>c</sup>EAR established by Institute of Medicine [31].

297 <sup>d</sup>AI of the US DRI published by the Food and Nutrition Board for the Health and Medicine Division, formerly  
298 Institute of Medicine [31].

299

300

301

## 302 **Discussion**

303 The study determined and compared the infant feeding practices and cost of diet in relation to  
304 macronutrient intake of six-month-old HEU versus HUU infants. The findings on infant  
305 feeding practices within the first six months contribute to the existing literature, with EBF  
306 reported at 50.0% among WLHIV; higher than reported in previous South African studies, and  
307 lower (34.0%) in HUU infants. The MBF is predominant among HUU infants. The mean total  
308 daily diet cost was similar among HEU and HUU infants, as well as the cost and intakes of  
309 protein, fat, and carbohydrates.

310 The WLHIV were found to have lower educational attainment compared to their counterparts,  
311 and according to Hargreaves and colleagues, HIV prevalence is higher amongst individuals  
312 with lower educational level [32]. Further, maternal HIV infection was associated with lower  
313 household monthly income. Naidoo et al. reported a reduced ability to generate revenue in  
314 households affected by HIV [33], while Pienaar and co-workers reported a high rate of  
315 unemployment among adults living with HIV compared to HIV-negative adults [34]. Lower-  
316 income could be linked to lower educational qualifications. We found non-significant  
317 differences in terms of food purchasing practices between WLHIV and their HIV-negative  
318 counterparts, despite the lower-income status of households of WLHIV. However, the overall  
319 amount of food purchased was not studied, so it may be that due to food insecurity households  
320 of WLHIV bought less food. The economic status of a household is the key determining factor  
321 for household food security as it directly impacts the food purchasing power and practices [18].  
322 A study that determined household food security reported high levels of moderate and severe

323 food insecurity among households affected by HIV infection [35]. The difference with the  
324 current study may be due to the small household sizes of WLHIV, as most had few children.

325 In our study, the self-reported percentage of early initiation of breastfeeding (EIBF) was high  
326 in both WLHIV and HIV-negative women (75.0%; 75.5%), and higher than previously  
327 reported in WLHIV (56.6%), HIV-negative women (61.2%) and the general population  
328 (67.3%) in South Africa [15,36], as well as globally in the general population (57.6%) as stated  
329 in a WHO global survey [37] and 58.3% in Ethiopia [38]. The EIBF rates also surpassed the  
330 WHO global target of 70% in both groups. The percentage of ever attempted breastfeeding was  
331 also higher in both groups compared to the previously reported 57.1% and 80.9% in South  
332 Africa [36,39]. On the other hand, EBF was on average (50.0%) in WLHIV; the 50% target of  
333 the United Nations Decade of Nutrition, but lower (34.0%) than this target in HIV-negative  
334 women. The reported percentage of EBF in this study among WLHIV is high compared to  
335 previous South African studies. These include the reported 12% in 2013 and 13% in 2015 the  
336 general population [40,41], and 35.6% as well as 44.7% reported among WLHIV and 42.8%  
337 in HIV-negative women [42,43]. The findings differed from those reported in separate studies  
338 among Ethiopian WLHIV (63.4% and 83.8%) [44,45]. The EBF and MBF practices may be  
339 influenced by the availability of a supportive society and the impact of aggressive marketing  
340 by the BMS industry on breastfeeding practices [46]. The percentages of MBF reported in this  
341 study was comparatively higher than previously reported in South Africa (12.4%) and from  
342 Ethiopian (10.5%) [42,45]. Mothers may assume that breastmilk is not sufficient for the infants  
343 and mixed feed to supplement it, and this places infants at risk of vertical HIV transmission as  
344 their intestinal mucosa is still immature and not well equipped to handle additional foods [45].

345 The FF reported in this study was lower than the previously reported percentages in South  
346 African WLHIV with infants aged 3 to 6 months [15,42]. Attending support group on infant



347 feeding practices and proper knowledge on vertical transmission of HIV through breastfeeding  
348 is associated with FF [42].

349 Most (89.1%) infants in the study were introduced to complementary feeding and BMS, while  
350 a few (10.9%) were still exclusively breastfed. The Ethiopian study reported 60.5% and 19.0%  
351 of timely and early introduction of complementary feeding, respectively [47]. A higher  
352 proportion of HUU infants were consuming CIC compared to their HEU counterparts. High  
353 consumption of CIC has been documented in South Africa among six months old infants; 70%  
354 by Swanepoel et al. and 92% by Budree et al. The possible reason for lower intake among HEU  
355 infants may be due to the cost of these food items, as consumption hinges on affordability [48].  
356 Intakes of staple food items such as maize meal and sorghum porridge did not differ between  
357 the HEU and HUU groups. These findings are similar to previously reported 23% and 20% in  
358 South Africa [20,41]. Maize meal and sorghum porridge are well known common traditional  
359 weaning foods in sub-Saharan Africa [49], are readily available at low cost. Although the  
360 fortification of maize meal is mandatory in South Africa, the consumption of maize meal  
361 porridge is still of concern among children as they consume a small quantity that is highly  
362 diluted with water, resulting in poor quality [19].

363 The findings showed non-significant differences between the HEU and HUU infants in terms  
364 of the total daily mean cost of diet, albeit that we documented a lower cost of diet in the HEU  
365 infants compared to the HUU infants ( $8.55 \pm 7.35$  ZAR ( $\$0.68 \pm 0.59$  USD) vs  $10.97 \pm 7.92$  ZAR  
366 ( $\$0.88 \pm 0.63$  USD)), considering the lower intake of CIC by HEU infants than their  
367 counterparts. Assumption is that the included BMS may be accountable for the diet cost  
368 discrepancy as formula milk may be costly. A daily Kenyan diet for 6 – 8 months old infants  
369 is estimated to cost a total of 17.04 ZAR ( $\$1.363$  USD), this includes the cost of combined  
370 energy only, micronutrient nutritious and food habits nutritious diets, utilising the Cost of the  
371 Diet software [50].



372 We found non-significant differences between the HEU and HUU infants for the cost of  
373 macronutrient intakes. There were no reports in the literature on the cost of nutrients in a  
374 complementary diet for the six-month age group. The percentages of adequate intake of protein  
375 and carbohydrates were low in both groups, and fat intake had the lowest percentage. However,  
376 61.5% of HEU and 67.9% of HUU infants were still being breastfed at the time of the study  
377 visit, with the breastmilk providing additional macronutrients. It is possible that infants were  
378 recently introduced to complementary foods and were consuming more of breastmilk and BMS  
379 than foods. Most mothers did not adhere to the EBF recommendation, feasibly introducing  
380 complementary feeds early, with financial implications in addition to being nutritionally  
381 suboptimal. The findings for protein and carbohydrate differed from the Malawian study,  
382 which reported adequate intakes among non-breastfed HEU infants [51]. However, the finding  
383 for low fat intake was in line with the Malawian study [51]. The inadequate macronutrient  
384 intakes in this study may be because the infants were recently introduced to complementary  
385 feeding.

386 The study determined the estimated daily cost of the complementary diet and BMS of HEU  
387 infants, who are likely to be vulnerable to food insecurities and are reported to be at greater  
388 risk of poor development [2]. The researcher obtained information or responses from caregivers  
389 about complementary foods and ways of enriching family foods given to infants through the  
390 infant's 24-hour recall. We determined the daily macronutrient intake of complementary diet  
391 and BMS as they contribute to the cost of diet. The BMS was included as it contributes to the  
392 cost of diet to the family, but this had limited the exactness of the estimation of the cost of  
393 complementary diets. For future research, measuring the nutrient intakes and their cost should  
394 incorporate the anthropometric measurements, so to determine if there is any association  
395 between the feeding practices and the infants' nutritional statuses.

## 396 **Conclusions**

397 We found no significant differences in cost of feeding and macronutrient intakes between HEU  
398 and HUU. Suboptimal breastfeeding practices remains an issue within first six months with no  
399 differences in EBF between HEU and HUU children and MBF being dominant in HUU  
400 children. Suboptimal EBF are likely linked to maternal misconceptions about infant feeding  
401 practices such as breastmilk alone being not enough for the infants or HIV vertical  
402 transmission. More sustained effort is required to support and promote EBF among South  
403 African mothers.

## 404 **Acknowledgements**

405 This is the substudy to Siyakhula study. We thank our research assistants: Maryjane Ntima,  
406 Sheilla Sono and Kedibone Matshai; Phumudzo Mamphwe for assistance with data cleaning;  
407 and the mothers and their children for their participation.

408

## 409   **References**

- 410   1. Ismail A, Lawal Y, Rabiun A, Mu'uta JI. Doppler velocimetry indices of human  
411   immunodeficiency virus-positive pregnant women and their controls at Aminu Kano  
412   Teaching Hospital, Kano. *Annals of African Medicine*. 2020;19(4):215. doi:  
413   10.4103/aam.aam\_40\_19
- 414   2. Chandna J, Ntozini R, Evans C, Kandawasvika G, Chasekwa B, Majo FD, et. al.  
415   Effects of improved complementary feeding and improved water, sanitation and  
416   hygiene on early child development among HIV-exposed children: substudy of a  
417   cluster randomised trial in rural Zimbabwe. *BMJ global health*. 2020 Jan  
418   1;5(1):e001718. doi: 10.1136/bmjgh-2019-001718
- 419   3. Statistics South Africa (Stats SA). Mid-year population estimates 2020. Statistics  
420   South Africa. 2021. [cited 2021 September 28] [http://www.statssa.gov.za/  
421   publications/P0302/P03022020.pdf](http://www.statssa.gov.za/publications/P0302/P03022020.pdf)
- 422   4. Human Sciences Research Council (HSRC). The fifth South African national HIV  
423   prevalence, incidence, behaviour and communication survey, 2017: HIV impact  
424   assessment summary report. Cape Town, HSRC Press; 2018. [cited 2021 September  
425   27]. Available from: [http://www.hsrc.ac.za/uploads/  
426   pageContent/9234/SABSSMV  
\\_Impact\\_Assessment\\_Summary\\_ZA\\_ADS\\_cleared\\_PDFA4.pdf](http://www.hsrc.ac.za/uploads/pageContent/9234/SABSSMV_Impact_Assessment_Summary_ZA_ADS_cleared_PDFA4.pdf)
- 427   5. Prevention of Mother-to-Child Transmission (PMTCT) of HIV. Avert 2018. [cited  
428   2021 September]. [https://www.avert.org/professionals/  
429   hivprogramming/  
prevention/prevention-mother-child](https://www.avert.org/professionals/hivprogramming/prevention/prevention-mother-child)
- 430   6. Clouse K, Malope-Kgokong B, Bor J, Nattey C, Mudau M, Maskew M. The South  
431   African National HIV Pregnancy Cohort: evaluating continuity of care among

- 432 women living with HIV. BMC public health. 2020 Dec;20(1):1-1. doi:  
433 10.1186/s12889-020-09679-1
- 434 7. Sint TT, Lovich R, Hammond W, Kim M, Melillo S, Lu L, et. al. Challenges in infant  
435 and young child nutrition in the context of HIV. AIDS (London, England). 2013  
436 Nov;27(0 2):S169. doi: 10.1097/QAD.0000000000000089
- 437 8. Rossouw ME, Cornell M, Cotton MF, Esser MM. Feeding practices and nutritional  
438 status of HIV-exposed and HIV-unexposed infants in the Western Cape. Southern  
439 African journal of HIV medicine. 2016 Jun 24;17(1). doi: 10.4102/sajhivmed.v17i1  
440 .398
- 441 9. Slogrove AL, Powis KM, Johnson LF, Stover J, Mahy M. Estimates of the global  
442 population of children who are HIV-exposed and uninfected, 2000–18: a modelling  
443 study. The Lancet Global Health. 2020 Jan 1;8(1):e67-75. doi: 10.1016/S2214-  
444 109X(19)30448-6
- 445 10. Rosala-Hallas A, Bartlett JW, Filteau S. Growth of HIV-exposed uninfected,  
446 compared with HIV-unexposed, Zambian children: a longitudinal analysis from  
447 infancy to school age. BMC pediatrics. 2017 Dec;17(1):1-9. doi: 10.1186/s12887-  
448 017-0828-6
- 449 11. Brink J, Pettifor JM, Lala SG. The prevalence of malnutrition in children admitted  
450 to a general paediatric ward at the Chris Hani Baragwanath Academic Hospital: A  
451 cross-sectional survey. South African Journal of Child Health. 2014 Sep 1;8(3):112-  
452 6.doi: 10.7196/sajch.787
- 453 12. World Health Organization, United Nations Children’s Fund. Guideline: updates on  
454 HIV and infant feeding: the duration of breastfeeding, and support from health

- 455 services to improve feeding practices among mothers living with HIV. Geneva:  
456 World Health Organization; 2016. [cited 2020 October 12] Available from:  
457 <https://apps.who.int/iris/bitstream/handle/10665/246260/9789241549707-eng.pdf>
- 458 13. Department of Health, Statistics South Africa, South African Medical Research  
459 Council, ICF. South African Demographic and Health Survey 2016: Key Indicators.  
460 Pretoria and Rockville, Maryland: DOH, Stats SA, SAMRC & ICF; 2017 [cited 2019  
461 June 12] Available from: <https://dhsprogram.com/pubs/pdf/FR337/FR337.pdf>
- 462 14. Remmert JE, Mosery N, Goodman G, Bangsberg DR, Safren SA, et al. Breastfeeding  
463 practices among women living with HIV in KwaZulu-Natal, South Africa: an  
464 observational study. Maternal and child health journal. 2020 Feb;24(2):127-34. doi:  
465 10.1007/s10995-019-02848-8
- 466 15. Nieuwoudt S, Manderson L, Norris SA. Infant feeding practices in Soweto, South  
467 Africa: Implications for healthcare providers. South African Medical Journal. 2018  
468 Oct 14;108(9). doi: 10.7196/SAMJ.2018.v108i9.13358
- 469 16. Patel DV, Bansal SC, Nimbalkar AS, et al. Breastfeeding practices, demographic  
470 variables, and their association with morbidities in children. Advances in preventive  
471 medicine. 2015;2015(892825). <https://doi.org/10.1155/2015/892825>
- 472 17. Cai X, Wardlaw T, Brown DW. Global trends in exclusive breastfeeding.  
473 International Breastfeeding Journal. 2012;7(12): 1-5. doi: 10.1186/1746-4358-7-12.  
474 <http://www.internationalbreastfeedingjournal.com/content/7/1/12>
- 475 18. Ladzani R. The impact of HIV and AIDS on food security and nutrition in South  
476 Africa. 2009. [cited 2020 September]. Available at:  
477 <http://hdl.handle.net/20.500.11910/4885>

- 478 19. Faber M, Laubscher R, Berti C. Poor dietary diversity and low nutrient density of  
479 the complementary diet for 6-to 24-month-old children in urban and rural  
480 KwaZulu-Natal, South Africa. *Maternal & child nutrition*. 2016;12(3): 528-545. doi:  
481 10.1111/mcn.12146
- 482 20. Swanepoel E, Havemann-Nel L, Rothman M, Laubscher R, Matsungu TM, Smuts  
483 CM, et. al. Contribution of commercial infant products and fortified staple foods to  
484 nutrient intake at ages 6, 12, and 18 months in a cohort of children from a low  
485 socio-economic community in South Africa. *Maternal & Child Nutrition*. 2019  
486 Apr;15(2):e12674. doi: 10.1111/mcn.12674
- 487 21. Ntila S, Siwela M, Kolanisi U, Abdelgadir H, Ndhlala A. An assessment of the food  
488 and nutrition security status of weaned 7–12 months old children in rural and peri-  
489 urban communities of Gauteng and Limpopo Provinces, South Africa. *International*  
490 *Journal of Environmental Research and Public Health*. 2017 Sep;14(9):1004. doi:  
491 10.3390/ijerph14091004
- 492 22. Andrieu E, Darmon N, Drewnowski A. Low-cost diets: more energy, fewer  
493 nutrients. *European journal of clinical nutrition*. 2006; 60: 434-436. doi:  
494 10.1038/sj.ejcn.1602331
- 495 23. Sztam KA, Fawzi WW, Duggan C. Macronutrient supplementation and food prices  
496 in HIV treatment. *The Journal of nutrition*. 2010;140(1):213S-223S. doi:  
497 [10.3945/jn.109.110569](https://doi.org/10.3945/jn.109.110569)
- 498 24. Klerks M, Bernal MJ, Roman S, Bodenstab S, Gil A, Sanchez-Siles LM. Infant  
499 cereals: Current status, challenges, and future opportunities for whole grains.  
500 *Nutrients*. 2019 Feb;11(2):473. doi: 10.3390/nu11020473

- 501 25. Innis SM. Fatty acids and early human development. *Early human development*.  
502 2007; 83(12):761-766. doi: 10.1016/j.earlhumdev.2007.09.004
- 503 26. Wu G. Dietary protein intake and human health. *Food & function*. 2016; 7(3): 1251-  
504 1265. doi: 10.1039/c5fo01530h
- 505 27. World Health Organization. Guidelines on HIV and infant feeding. Principles and  
506 recommendations for infant feeding in the context of HIV and a summary of  
507 evidence. Geneva: World Health Organization; 2010. [cited 2019 April, 12].  
508 Available at: [https://apps.who.int/iris/bitstream/handle/10665/44345/9789241](https://apps.who.int/iris/bitstream/handle/10665/44345/9789241599535_eng.pdf)  
509 [599535\\_eng.pdf](https://apps.who.int/iris/bitstream/handle/10665/44345/9789241599535_eng.pdf)
- 510 28. Walker JL, Ardouin S, Burrows T. The validity of dietary assessment methods to  
511 accurately measure energy intake in children and adolescents who are overweight or  
512 obese: a systematic review. *European journal of clinical nutrition*. 2018; 72(2): 185-  
513 197. doi: [10.1038/s41430-017-0029-2](https://doi.org/10.1038/s41430-017-0029-2)
- 514 29. Monsivais P, Perrigue M, Adams S, Drewnowski A. Measuring diet cost at the  
515 individual level: a comparison of three methods. *European journal of clinical*  
516 *nutrition*. 2013; 67(11), 1220-1225. doi: 10.1038/ejcn.2013.176
- 517 30. South African Food Data Systems. SAMRC Food Quantities Manual for South  
518 Africa. 3rd Edition (ebook). Cape Town: South African Medical Research Council;  
519 2018. [cited 2020 March 27]. Available at: <http://safoods.mrc.ac.za>
- 520 31. Institute of Medicine. Dietary reference intakes for energy, carbohydrate, fiber, fat,  
521 fatty acids, cholesterol, protein and amino acids (macronutrients). The National  
522 Academies Press: Washington, DC; 2005. [cited 2020 August 18] Available at:  
523 <https://doi.org/10.17226/10490>

- 524 32. Hargreaves JR, Bonell CP, Boler T, Boccia D, Birdthistle I, Fletcher A, et al.  
525 Systematic review exploring time trends in the association between educational  
526 attainment and risk of HIV infection in sub-Saharan Africa. *Aids*. 2008 Jan  
527 30;22(3):403-14.doi: 10.1097/QAD.0b013e3282f2aac3
- 528 33. Naidoo D, Taylor M, Mabaso M. Poverty and HIV/AIDS: impact of social grants  
529 among south African Indians in an urban setting in Kwazulu-Natal, South Africa.  
530 *BAOJ HIV*. 2017; 3(1): 023
- 531 34. Pienaar M, Van Rooyen FC, Walsh CM. Household food security and HIV status in  
532 rural and urban communities in the Free State province, South Africa. *SAHARA-J:  
533 Journal of Social Aspects of HIV/AIDS*. 2017; 14(1): 118-131. doi:  
534 10.1080/17290376.2017.1379428
- 535 35. Baiyegunhi LJ, Makwangudze KE. Home Gardening and Food Security Status of  
536 HIV/AIDS Affected Households in Mpophomeni, KwaZulu-Natal Province. *South  
537 Africa. Journal of Human Ecology*. 2013; 44(1):1-8. doi:  
538 10.1080/09709274.2013.11906637
- 539 36. Vitalis D, Vilar-Compte M, Nyhan K, Pérez-Escamilla R. Breastfeeding inequities  
540 in South Africa: Can enforcement of the WHO Code help address them?—A  
541 systematic scoping review. *International Journal for Equity in Health*. 2021;20(1):1-  
542 7. doi: 10.1186/s12939-021-01441-2
- 543 37. Takahashi K, Ganchimeg T, Ota E, Vogel JP, Souza JP, Laopaiboon M, et. al.  
544 Prevalence of early initiation of breastfeeding and determinants of delayed initiation  
545 of breastfeeding: secondary analysis of the WHO Global Survey. *Scientific reports*.  
546 2017 Mar 21;7(1):1-0.doi: 10.1038/srep44868



- 547 38. Ekubay M, Berhe A, Yisma E. Initiation of breastfeeding within one hour of birth  
548 among mothers with infants younger than or equal to 6 months of age attending  
549 public health institutions in Addis Ababa, Ethiopia. *International breastfeeding*  
550 *journal*. 2018;13(4):1-7. doi: 10.1186/s13006-018-0146-0
- 551 39. Bork KA, Cournil A, Read JS, Newell ML, Cames C, Meda N, et. al. Morbidity in  
552 relation to feeding mode in African HIV-exposed, uninfected infants during the first  
553 6 mo of life: the Kesho Bora study. *The American journal of clinical nutrition*. 2014  
554 Dec 1;100(6):1559-68.doi: 10.3945/ajcn.113.082149
- 555 40. Siziba L, Jerling J, Hanekom S, Wentzel-Viljoen E. Low rates of exclusive  
556 breastfeeding are still evident in four South African provinces. *South African Journal*  
557 *of Clinical Nutrition*. 2015; 28(4):170-179. doi: 10.1080/16070658.2015.11734557
- 558 41. Budree S, Goddard E, Brittain K, Cader S, Myer L, Zar HJ. Infant feeding practices  
559 in a South African birth cohort—A longitudinal study. *Maternal & child nutrition*.  
560 2017 Jul;13(3):e12371.doi: 10.1111/mcn.12371
- 561 42. Ladzani R, Peltzer K, Mlambo MG, Phaweni K. Infant-feeding practices and  
562 associated factors of HIV-positive mothers at Gert Sibande, South Africa. *Acta*  
563 *Paediatrica*. 2011 Apr;100(4):538-42. doi: 10.1111/j.1651-2227.2010.02080.x
- 564 43. Reimers P, Israel-Ballard K, Craig M, Spies L, Thior I, Tanser F, et. al. A cluster  
565 randomised trial to determine the efficacy of the “feeding buddies” programme in  
566 improving exclusive breastfeeding rates among HIV-infected women in rural  
567 KwaZulu-Natal, South Africa. *AIDS and Behavior*. 2018 Jan;22(1):212-23.doi:  
568 10.1007/s10461-017-1865-8

- 569 44. Belay GM, Wubneh CA. Infant feeding practices of HIV positive mothers and its  
570 association with counseling and HIV disclosure status in Ethiopia: A systematic  
571 review and meta-analysis. *AIDS research and treatment*, 2019. 2019; 2019. doi:  
572 10.1155/2019/3862098
- 573 45. Muluye D, Woldeyohannes D, Gizachew M, Tiruneh M. Infant feeding practice and  
574 associated factors of HIV positive mothers attending prevention of mother to child  
575 transmission and antiretroviral therapy clinics in Gondar Town health institutions,  
576 Northwest Ethiopia. *BMC public health*. 2012;12(240):1-7. doi: 10.1186/1471-  
577 2458-12-240
- 578 46. Rollins NC, Bhandari N, Hajeebhoy N, Horton S, Lutter CK, Martines JC, et. al.  
579 Why invest, and what it will take to improve breastfeeding practices?. *The lancet*.  
580 2016 Jan 30;387(10017):491-504. doi: 10.1016/S0140-6736(15)01044-2
- 581 47. Semahegn A, Tesfaye G, Bogale A. Complementary feeding practice of mothers and  
582 associated factors in Hiwot Fana Specialized Hospital, Eastern Ethiopia. *Pan Afr*  
583 *Med J*. 2014;18:143. doi: 10.11604/pamj.2014.18.143.3496
- 584 48. Katepa-Bwalya M, Mukonka V, Kankasa C, Masaninga F, Babaniyi O, Siziya S.  
585 Infants and young children feeding practices and nutritional status in two districts of  
586 Zambia. *International breastfeeding journal*. 2015 Dec;10(1):1-8.doi:  
587 10.1186/s13006-015-0033-x
- 588 49. Kayodé AP, Nout MJ, Bakker EJ, Van Boekel MA. Evaluation of the simultaneous  
589 effects of processing parameters on the iron and zinc solubility of infant sorghum  
590 porridge by response surface methodology. *Journal of agricultural and food*  
591 *chemistry*. 2006;54(12):4253-4259. doi: 10.1021/jf0530493

- 592 50. Save the Children. A Cost of the Diet analysis in Turkana County, Kenya: Central  
593 Pastoral Livelihood Zone. Nairobi, Kenya. 2017. [cited 2020 August 12]. Available  
594 at: [https://www.savethechildren.org.uk/content/dam/global/reports/health-and-](https://www.savethechildren.org.uk/content/dam/global/reports/health-and-nutrition/cost-diet-analysis-turkana.pdf)  
595 [nutrition/cost-diet-analysis-turkana.pdf](https://www.savethechildren.org.uk/content/dam/global/reports/health-and-nutrition/cost-diet-analysis-turkana.pdf)
- 596 51. Parker ME, Tembo M, Adair L, Chasela C, Piwoz EG, Jamieson DJ, et. al. The health  
597 of HIV-exposed children after early weaning. *Maternal & child nutrition*. 2013  
598 Apr;9(2):217-32.doi: 10.1111/j.1740-8709.2011.00369.x
- 599 52. United States Department of Agriculture Food and Nutrition Service. Infant nutrition  
600 and feeding: A guide for use in the special supplementary nutrition program for  
601 women, infant and children (WIC). Washington DC; 2019. [cited 2020 August 22].  
602 Available at: [https://wicworks.fns.usda.gov/sites/default/files/](https://wicworks.fns.usda.gov/sites/default/files/media/document/Infant_Nutrition_and_Feeding_Guide.pdf) [media/document/](https://wicworks.fns.usda.gov/sites/default/files/media/document/Infant_Nutrition_and_Feeding_Guide.pdf)  
603 [Infant Nutrition\\_and\\_Feeding\\_Guide.pdf](https://wicworks.fns.usda.gov/sites/default/files/media/document/Infant_Nutrition_and_Feeding_Guide.pdf)  
604  
605  
606
